# Supplementary material for: Genetic Dissection of Seed Dormancy in Rice (Oryza sativa L.) by Using Two Mapping Populations Derived from Common Parents
Source: PubMed Central journal article supplement (PMC7406625; doi:10.1186/s12284-020-00413-4), 2020-08-05

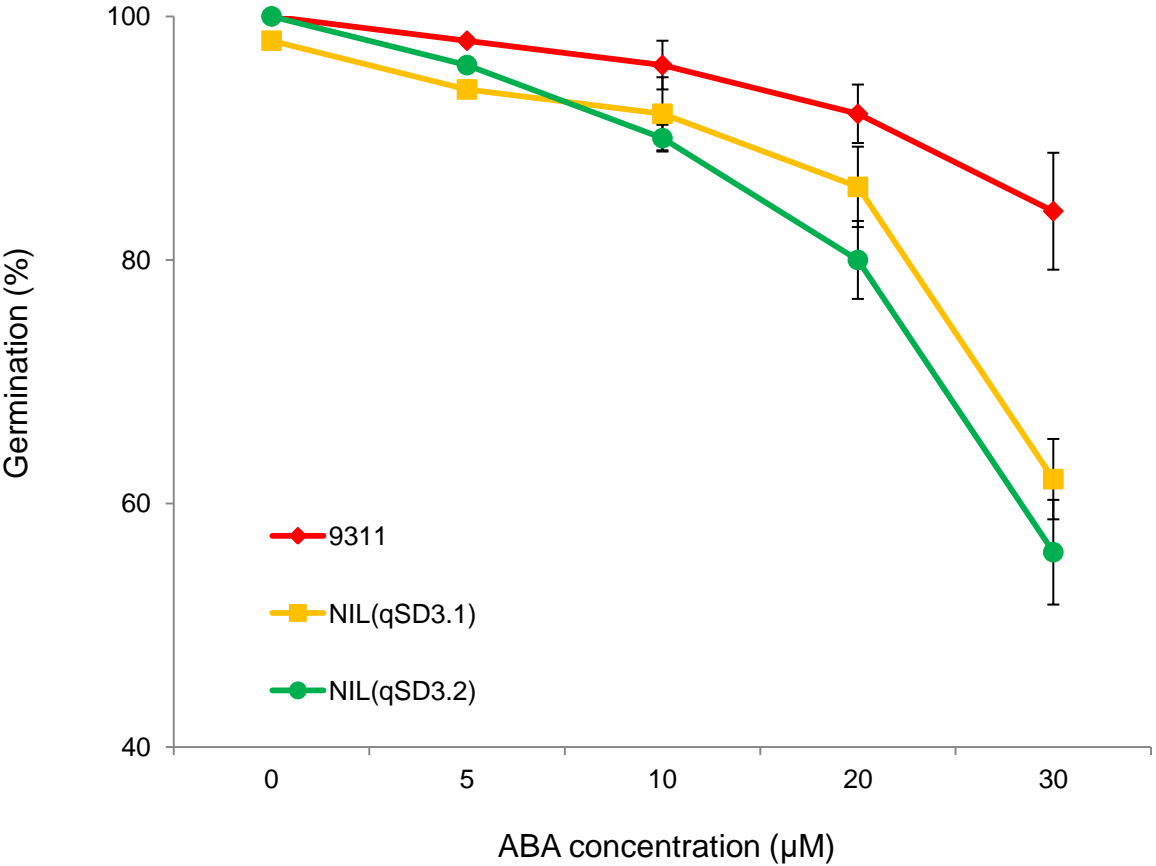

Supplement: 12284_2020_413_MOESM10_ESM.pdf [file 12284_2020_413_MOESM10_ESM.pdf]
